# Supplementary material for: A Dynamic Model of Interactions of Ca2+, Calmodulin, and Catalytic Subunits of Ca2+/Calmodulin-Dependent Protein Kinase II
Source: PLOS journal article supplement (doi:10.1371/journal.pcbi.1000675), 2010-02-11
Supplement: S5 (10.1371/journal.pcbi.1000675.s005) [file journal.pcbi.1000675.s005]

**Table S3.** Sensitivity of autophosphorylation of CaMKII to variations in input parameters (varied over a 2.5 fold range from mean of data in Table S1) as measured by partial rank correlation coefficient (PRCC) at different  $\text{Ca}^{2+}$  concentration ranges. Model parameters are ranked by their PRCC values at 0.1, 1 and 2 seconds after  $\text{Ca}^{2+}$  addition. Parameters with PRCC values lower than 0.3 are not shown.

| 0.1 sec                                                                      |                     |       | 1 sec                                |                     |       | 2 sec                                |                     |       |
|------------------------------------------------------------------------------|---------------------|-------|--------------------------------------|---------------------|-------|--------------------------------------|---------------------|-------|
| Parameter                                                                    | Confidence Interval |       | Parameter                            | Confidence Interval |       | Parameter                            | Confidence Interval |       |
| <b>Low <math>\text{Ca}^{2+}</math> (1 - 5 <math>\mu\text{M}</math>)</b>      |                     |       |                                      |                     |       |                                      |                     |       |
| $[\text{Ca}^{2+}]$                                                           | 0.78                | 0.73  | $[\text{Ca}^{2+}]$                   | 0.78                | 0.73  | $[\text{Ca}^{2+}]$                   | 0.78                | 0.73  |
| $k_p^{\text{CaM}1\text{C}}$                                                  | 0.73                | 0.66  | $k_p^{\text{CaM}1\text{C}}$          | 0.72                | 0.66  | $k_p^{\text{CaM}1\text{C}}$          | 0.72                | 0.65  |
| $k_p^{\text{CaM}1\text{N}}$                                                  | 0.64                | 0.56  | $[\text{CaM}]$                       | 0.64                | 0.56  | $[\text{CaM}]$                       | 0.64                | 0.57  |
| $[\text{CaM}]$                                                               | 0.63                | 0.55  | $k_p^{\text{CaM}2\text{C}}$          | 0.57                | 0.48  | $k_p^{\text{CaM}2\text{C}}$          | 0.60                | 0.52  |
| $k_{\text{on}}^{\text{K}1\text{N}}$                                          | 0.43                | 0.32  | $k_p^{\text{CaM}1\text{N}}$          | 0.48                | 0.38  | $k_p^{\text{CaM}1\text{N}}$          | 0.46                | 0.36  |
| $k_p^{\text{CaM}2\text{N}}$                                                  | 0.40                | 0.29  | $k_{\text{on}}^{\text{K}1\text{N}}$  | 0.46                | 0.36  | $k_{\text{on}}^{\text{K}1\text{N}}$  | 0.45                | 0.35  |
| $k_{\text{on}}^{\text{K}1\text{C}}$                                          | -0.29               | -0.40 | $k_{\text{off}}^{\text{K}1\text{N}}$ | -0.36               | -0.46 | $k_{\text{off}}^{\text{K}1\text{N}}$ | -0.35               | -0.45 |
| $k_{\text{off}}^{\text{K}1\text{N}}$                                         | -0.39               | -0.49 | $\text{K}_\text{D}$                  | -0.62               | -0.69 | $\text{K}_\text{D}$                  | -0.62               | -0.69 |
| $\text{K}_\text{D}$                                                          | -0.64               | -0.71 |                                      |                     |       |                                      |                     |       |
| <b>Medium <math>\text{Ca}^{2+}</math> (10 - 50 <math>\mu\text{M}</math>)</b> |                     |       |                                      |                     |       |                                      |                     |       |
| $[\text{Ca}^{2+}]$                                                           | 0.78                | 0.73  | $[\text{Ca}^{2+}]$                   | 0.78                | 0.73  | $[\text{Ca}^{2+}]$                   | 0.78                | 0.73  |
| $k_p^{\text{CaM}4}$                                                          | 0.65                | 0.58  | $k_p^{\text{CaM}2\text{C}}$          | 0.59                | 0.51  | $k_p^{\text{CaM}2\text{C}}$          | 0.63                | 0.55  |
| $k_p^{\text{CaM}2\text{N}1\text{C}}$                                         | 0.61                | 0.53  | $k_{\text{on}}^{\text{K}1\text{N}}$  | 0.53                | 0.43  | $k_{\text{on}}^{\text{K}1\text{N}}$  | 0.53                | 0.43  |
| $k_p^{\text{CaM}1\text{N}2\text{C}}$                                         | 0.38                | 0.27  | $k_p^{\text{CaM}1\text{N}2\text{C}}$ | 0.46                | 0.36  | $k_p^{\text{CaM}1\text{N}2\text{C}}$ | 0.48                | 0.37  |
| $k_p^{\text{CaM}2\text{N}}$                                                  | 0.37                | 0.26  | $k_p^{\text{CaM}4}$                  | 0.46                | 0.36  | $k_{\text{off}}^{\text{K}1\text{C}}$ | 0.43                | 0.32  |
| $k_p^{\text{CaM}1\text{C}}$                                                  | 0.36                | 0.25  | $k_{\text{off}}^{\text{K}1\text{C}}$ | 0.43                | 0.32  | $k_{\text{off}}^{\text{K}2\text{C}}$ | 0.41                | 0.30  |
| $k_{\text{on}}^{\text{K}2\text{N}}$                                          | 0.36                | 0.25  | $k_p^{\text{CaM}1\text{C}}$          | 0.39                | 0.28  | $k_p^{\text{CaM}1\text{C}}$          | 0.40                | 0.30  |
| $k_{\text{off}}^{\text{K}2\text{N}}$                                         | -0.26               | -0.37 | $k_{\text{on}}^{\text{K}2\text{N}}$  | 0.38                | 0.27  | $k_p^{\text{CaM}4}$                  | 0.40                | 0.29  |
| $\text{K}_\text{D}$                                                          | -0.63               | -0.70 | $k_{\text{off}}^{\text{K}2\text{N}}$ | -0.28               | -0.39 | $k_{\text{on}}^{\text{K}2\text{C}}$  | -0.31               | -0.42 |
|                                                                              |                     |       | $k_{\text{on}}^{\text{K}2\text{C}}$  | -0.31               | -0.42 | $k_{\text{on}}^{\text{K}1\text{C}}$  | -0.32               | -0.42 |
|                                                                              |                     |       | $k_{\text{on}}^{\text{K}1\text{C}}$  | -0.34               | -0.44 | $k_{\text{off}}^{\text{K}1\text{N}}$ | -0.43               | -0.52 |
|                                                                              |                     |       | $k_{\text{off}}^{\text{K}1\text{N}}$ | -0.42               | -0.52 | $\text{K}_\text{D}$                  | -0.61               | -0.68 |
|                                                                              |                     |       | $\text{K}_\text{D}$                  | -0.61               | -0.69 |                                      |                     |       |
| <b>High <math>\text{Ca}^{2+}</math> (50 - 250 <math>\mu\text{M}</math>)</b>  |                     |       |                                      |                     |       |                                      |                     |       |
| $[\text{Ca}^{2+}]$                                                           | 0.68                | 0.61  | $[\text{Ca}^{2+}]$                   | 0.68                | 0.60  | $[\text{Ca}^{2+}]$                   | 0.68                | 0.60  |
| $k_p^{\text{CaM}4}$                                                          | 0.64                | 0.56  | $k_p^{\text{CaM}4}$                  | 0.58                | 0.50  | $[\text{CaM}]$                       | 0.55                | 0.46  |
| $[\text{CaM}]$                                                               | 0.54                | 0.44  | $[\text{CaM}]$                       | 0.52                | 0.43  | $k_p^{\text{CaM}4}$                  | 0.54                | 0.45  |
