# Supplementary material for: A Dynamic Model of Interactions of Ca2+, Calmodulin, and Catalytic Subunits of Ca2+/Calmodulin-Dependent Protein Kinase II
Source: PLoS Comput Biol. 2010 Feb 12;6(2):e1000675. doi: 10.1371/journal.pcbi.1000675 (PMC2820514; doi:10.1371/journal.pcbi.1000675)
Supplement: Table S1 — Parameters for Model S1. Most values are taken from the literature or derived from values in the literature. In a few instances values were derived by fitting to published experimental data as described in Methods. (0.76 MB PDF) [file pcbi.1000675.s003.pdf]

**Table S1. Parameter Values for Model 1**

Most values are taken from the literature or derived from values in the literature. In a few instances values were derived by fitting to published experimental data as described in Methods.

| Parameter                             | Description                                                               | Value Range                                | Reference |
|---------------------------------------|---------------------------------------------------------------------------|--------------------------------------------|-----------|
| <b>Ca<sup>2+</sup> binding to CaM</b> |                                                                           |                                            |           |
| $K_D^{1C}$                            | Equilibrium binding of 1 <sup>st</sup> Ca <sup>2+</sup> to CaM C-terminus | 7.3 - 12 uM                                | [1-3]     |
| $k_{off}^{1C}$                        | Ca <sup>2+</sup> dissociation from CaM C-terminus                         | 10 - 70 s <sup>-1</sup>                    | [4-6]     |
| $k_{on}^{1C}$                         | Ca <sup>2+</sup> binding to CaM C-terminus                                | 1.2 - 9.6 uM <sup>-1</sup> s <sup>-1</sup> | [7]       |
| $K_D^{2C}$                            | Equilibrium binding of 2 <sup>nd</sup> Ca <sup>2+</sup> to CaM C-terminus | 0.4 - 1.7 uM                               | [1-3]     |
| $k_{off}^{2C}$                        | 2 <sup>nd</sup> Ca <sup>2+</sup> dissociation from CaM C-terminus         | 8.5 - 10 s <sup>-1</sup>                   | [4]       |
| $k_{on}^{2C}$                         | 2 <sup>nd</sup> Ca <sup>2+</sup> binding to CaM C-terminus                | 5 - 25 uM <sup>-1</sup> s <sup>-1</sup>    | [7]       |
| $K_D^{1N}$                            | Equilibrium binding of 1 <sup>st</sup> Ca <sup>2+</sup> to CaM N-terminus | 15 - 40 uM                                 | [1-3]     |
| $k_{off}^{1N}$                        | 1 <sup>st</sup> Ca <sup>2+</sup> dissociation from CaM N-terminus         | 1000 - 4000 s <sup>-1</sup>                | [4,6,8,9] |
| $k_{on}^{1N}$                         | 1 <sup>st</sup> Ca <sup>2+</sup> binding to CaM N-terminus                | 25 - 260 uM <sup>-1</sup> s <sup>-1</sup>  | [7]       |
| $K_D^{2N}$                            | Equilibrium binding of 2 <sup>nd</sup> Ca <sup>2+</sup> to CaM N-terminus | 3.3 - 9 uM                                 | [1-3]     |
| $k_{off}^{2N}$                        | 2 <sup>nd</sup> Ca <sup>2+</sup> dissociation from CaM N-terminus         | 500 - >1000 s <sup>-1</sup>                | [4-6,8,9] |
| $k_{on}^{2N}$                         | 2 <sup>nd</sup> Ca <sup>2+</sup> binding to CaM N-terminus                | 50 - 300 uM <sup>-1</sup> s <sup>-1</sup>  | [7]       |
| <b>CaM binding to CaMKII</b>          |                                                                           |                                            |           |
| $k_{on}^{CaM0}$                       | CaM0 binding to CaMKII                                                    | 3.8 mM <sup>-1</sup> s <sup>-1</sup>       | [10]      |
| $k_{off}^{CaM0}$                      | CaM0 dissociating from CaMKII                                             | 5.5 s <sup>-1</sup>                        | [10]      |
| $k_{on}^{CaM1C}$                      | CaM1C binding to CaMKII                                                   | 59 mM <sup>-1</sup> s <sup>-1</sup>        | [10]      |
| $k_{off}^{CaM1C}$                     | CaM1C dissociating from CaMKII                                            | 6.1 s <sup>-1</sup>                        | [10]      |
| $K_D^{CaM2C}$                         | Equilibrium binding of CaM2C to CaMKII                                    | 1.6 - 8.4 uM                               | [2]       |
| $k_{on}^{CaM2C}$                      | CaM2C binding to CaMKII                                                   | 0.92 uM <sup>-1</sup> s <sup>-1</sup>      | [10]      |
| $k_{off}^{CaM2C}$                     | CaM2C dissociating from CaMKII                                            | 6.8 s <sup>-1</sup>                        | [10]      |
| $k_{on}^{CaM1N1C}$                    | CaM1N1C binding to CaMKII                                                 | 0.33 uM <sup>-1</sup> s <sup>-1</sup>      | [10]      |
| $k_{off}^{CaM1N1C}$                   | CaM1N1C dissociating from CaMKII                                          | 3.4 s <sup>-1</sup>                        | [10]      |
| $k_{on}^{CaM1N2C}$                    | CaM1N2C binding to CaMKII                                                 | 5.2 uM <sup>-1</sup> s <sup>-1</sup>       | [10]      |
| $k_{off}^{CaM1N2C}$                   | CaM1N2C dissociating from CaMKII                                          | 3.8 s <sup>-1</sup>                        | [10]      |
| $k_{on}^{CaM1N}$                      | CaM1N binding to CaMKII                                                   | 22 mM <sup>-1</sup> s <sup>-1</sup>        | [10]      |
| $k_{off}^{CaM1N}$                     | CaM1N dissociating from CaMKII                                            | 3.1 s <sup>-1</sup>                        | [10]      |
| $K_D^{CaM2N}$                         | Equilibrium binding of CaM2N to CaMKII                                    | 16.5 - 23.5 uM                             | [2]       |
| $k_{on}^{CaM2N}$                      | CaM2N binding to CaMKII                                                   | 0.12 uM <sup>-1</sup> s <sup>-1</sup>      | [10]      |
| $k_{off}^{CaM2N}$                     | CaM2N dissociating from CaMKII                                            | 1.7 s <sup>-1</sup>                        | [10]      |

|                                              |                                                                     |                              |             |
|----------------------------------------------|---------------------------------------------------------------------|------------------------------|-------------|
| $k_{on}^{CaM\ 2N1C}$                         | CaM2N1C binding to CaMKII                                           | $1.9\ \mu M^{-1}s^{-1}$      | [10]        |
| $k_{off}^{CaM\ 2N1C}$                        | CaM2N1C dissociating from CaMKII                                    | $1.9\ s^{-1}$                | [10]        |
| $K_D^{CaM\ 4}$                               | Equilibrium binding of CaM4 to CaMKII                               | 0.04 - 0.08 $\mu M$          | [2,4,11-13] |
| $k_{on}^{CaM\ 4}$                            | CaM4 binding to CaMKII                                              | $14 - 60\ \mu M^{-1}s^{-1}$  | [7]         |
| $k_{off}^{CaM\ 4}$                           | CaM4 dissociating from CaMKII                                       | $1.1 - 2.3\ s^{-1}$          | [14]        |
| <b>Ca<sup>2+</sup> binding to CaM-CaMKII</b> |                                                                     |                              |             |
| $k_{off}^{K1C}$                              | 1 <sup>st</sup> Ca <sup>2+</sup> dissociation from K•CaM C-terminus | $33\ s^{-1}$                 | [15]        |
| $k_{on}^{K1C}$                               | 1 <sup>st</sup> Ca <sup>2+</sup> binding to K•CaM C-terminus        | $44\ \mu M^{-1}s^{-1}$       | [15]        |
| $k_{off}^{K2C}$                              | 2 <sup>nd</sup> Ca <sup>2+</sup> dissociation from K•CaM C-terminus | $0.49 - 4.9\ s^{-1}$         | [4,8,14,15] |
| $k_{on}^{K2C}$                               | 2 <sup>nd</sup> Ca <sup>2+</sup> binding to K•CaM C-terminus        | $44\ \mu M^{-1}s^{-1}$       | [15]        |
| $k_{off}^{K1N}$                              | 1 <sup>st</sup> Ca <sup>2+</sup> dissociation from K•CaM N-terminus | $300\ s^{-1}$                | [15]        |
| $k_{on}^{K1N}$                               | 1 <sup>st</sup> Ca <sup>2+</sup> binding to K•CaM N-terminus        | $76\ \mu M^{-1}s^{-1}$       | [15]        |
| $k_{off}^{K2N}$                              | 2 <sup>nd</sup> Ca <sup>2+</sup> dissociation from K•CaM N-terminus | $6 - 60\ s^{-1}$             | [4,8,14,15] |
| $k_{on}^{K2N}$                               | 2 <sup>nd</sup> Ca <sup>2+</sup> binding to K•CaM N-terminus        | $76\ \mu M^{-1}s^{-1}$       | [15]        |
| <b>CaMKII autophosphorylation</b>            |                                                                     |                              |             |
| $K_D^{CaMKII}$                               | Equilibrium binding of two CaMKII subunits                          | 1.3 - 45 $\mu M$             | [16,17]     |
| $k_{on}^{CaMKII}$                            | K•CaM binding to KCaM                                               | $10 - 100\ \mu M^{-1}s^{-1}$ | [18,19]     |
| $k_{off}^{CaMKII}$                           | K•CaM dissociation from KCaM                                        | $13 - 4500\ s^{-1}$          | [7]         |
| $k_{on}^{CaMKIIP}$                           | K•CaM binding to pKCaM                                              | $10 - 100\ \mu M^{-1}s^{-1}$ | [18,19]     |
| $k_{off}^{CaMKIIP}$                          | K•CaM dissociation from pKCaM                                       | $13 - 4500\ s^{-1}$          | [7]         |
| $k_p^{CaM\ 0}$                               | Autophosphorylation of KCaM0                                        | $0\ s^{-1}$                  | [20]        |
| $k_p^{CaM\ 1C}$                              | Autophosphorylation of KCaM1C                                       | $0.0 - 0.084\ s^{-1}$        | [20]        |
| $k_p^{CaM\ 2C}$                              | Autophosphorylation of KCaM2C                                       | $0.044 - 0.084\ s^{-1}$      | [2]         |
| $k_p^{CaM\ 1N1C}$                            | Autophosphorylation of KCaM1N1C                                     | $0.0 - 0.16\ s^{-1}$         | [20]        |
| $k_p^{CaM\ 1N2C}$                            | Autophosphorylation of KCaM1N2C                                     | $0.044 - 1.25\ s^{-1}$       | [20]        |
| $k_p^{CaM\ 1N}$                              | Autophosphorylation of KCaM1N                                       | $0.0 - 0.16\ s^{-1}$         | [20]        |
| $k_p^{CaM\ 2N}$                              | Autophosphorylation of KCaM2N                                       | $0.079 - 0.16\ s^{-1}$       | [2]         |
| $k_p^{CaM\ 2N1C}$                            | Autophosphorylation of KCaM2N1C                                     | $0.079 - 1.25\ s^{-1}$       | [20]        |
| $k_p^{CaM\ 4}$                               | Autophosphorylation of KCaM4                                        | $0.5 - 1.25\ s^{-1}$         | [2,21]      |

1. Linse S, Helmersson A, Forsen S (1991) Calcium binding to calmodulin and its globular domains. J Biol Chem 266: 8050-8054.
2. Shifman JM, Choi MH, Mihalas S, Mayo SL, Kennedy MB (2006) Ca<sup>2+</sup>/Calmodulin-dependent protein kinase II (CaMKII) is activated by calmodulin with two bound calciums. Proc Natl Acad Sci U S A 103: 13968-13973.

3. Kubota Y, Putkey J, Waxham M (2007) Neurogranin controls the spatiotemporal pattern of postsynaptic  $\text{Ca}^{2+}$ /CaM signaling. *Biophys J* 93: 3848-3859.
4. Gaertner TR, Putkey JA, Waxham MN (2004) RC3/Neurogranin and  $\text{Ca}^{2+}$ /calmodulin-dependent protein kinase II produce opposing effects on the affinity of calmodulin for calcium. *J Biol Chem* 279: 39374-39382.
5. Martin S, Maune J, Beckingham K, Bayley P (1992) Stopped-flow studies of calcium dissociation from calcium-binding-site mutants of *Drosophila melanogaster* calmodulin. *European Journal of Biochemistry* 205: 1107-1114.
6. Persechini A, White HD, Gansz KJ (1996) Different mechanisms for  $\text{Ca}^{2+}$  dissociation from complexes of calmodulin with nitric oxide synthase or myosin light chain kinase. *J Biol Chem* 271: 62-67.
7. Calculated from the relationship  $K_D = k_{\text{off}}/k_{\text{on}}$ .
8. Peersen OB, Madsen TS, Falke JJ (1997) Intermolecular tuning of calmodulin by target peptides and proteins: differential effects on  $\text{Ca}^{2+}$  binding and implications for kinase activation. *Protein Sci* 6: 794-807.
9. Brown SE, Martin SR, Bayley PM (1997) Kinetic control of the dissociation pathway of calmodulin-peptide complexes. *J Biol Chem* 272: 3389-3397.
10. Determined in this work. Fit to experimental time series data in reference 13.
11. Rosenberg OS, Deindl S, Sung R-J, Nairn AC, Kuriyan J (2005) Structure of the autoinhibited kinase domain of CaMKII and SAXS analysis of the holoenzyme. 0092-8674 123: 849-860.
12. De Koninck P, Schulman H (1998) Sensitivity of CaM Kinase II to the frequency of  $\text{Ca}^{2+}$  oscillations. *Science* 279: 227-230.
13. Meyer T, Hanson PI, Stryer L, Schulman H (1992) Calmodulin trapping by calcium-calmodulin-dependent protein kinase. *Science* 256: 1199-1202.
14. Singla SI, Hudmon A, Goldberg JM, Smith JL, Schulman H (2001) Molecular characterization of calmodulin trapping by calcium/calmodulin-dependent protein kinase II. *J Biol Chem* 276: 29353-29360.
15. Determined in this work. Fit to experimental time series data in reference 4.
16. Hanson PI, Meyer T, Stryer L, Schulman H (1994) Dual role of calmodulin in autophosphorylation of multifunctional CaM kinase may underlie decoding of calcium signals. *Neuron* 12.
17. Determined in this work. Fit to experimental time series data in Bradshaw JM, Hudmon A, Shulman H (2002) Chemical Quenched Flow Kinetic Studies Indicate an Intraholoenzyme Autophosphorylation Mechanism for  $\text{Ca}^{2+}$ . *J Biol Chem* 277: 20991-20998.
18. Assumed to be slightly less than an ideal (diffusion only limited) interaction between enzyme and substrate; as reported in Copeland, *Enzymes*, 2000.
19. Copeland R (2000) *Enzymes: a practical introduction to structure, mechanism, and data analysis*. New York: Wiley-VCH. 121 p.
20. Extrapolated from published values in reference 2.
21. Miller SG, Kennedy MB (1986) Regulation of brain Type II  $\text{Ca}^{2+}$ /Calmodulin-dependent protein kinase by autophosphorylation: a  $\text{Ca}^{2+}$ -triggered molecular switch. 0092-8674 44: 861-870.
