# Supplementary material for: A Dynamic Model of Interactions of Ca2+, Calmodulin, and Catalytic Subunits of Ca2+/Calmodulin-Dependent Protein Kinase II
Source: PLoS Comput Biol. 2010 Feb 12;6(2):e1000675. doi: 10.1371/journal.pcbi.1000675 (PMC2820514; doi:10.1371/journal.pcbi.1000675)
Supplement: Table S2 — Fitted cooperativity coefficients with their on and off components. The parameters were fit as described in Methods and Figure 4. (0.04 MB PDF) [file pcbi.1000675.s004.pdf]

**Table S2. Fitted cooperativity coefficients with their on and off components**

The parameters were fit as described in Methods and in Text Figure 4.

|                                 |             |
|---------------------------------|-------------|
| <b><i>s</i></b>                 | <b>10</b>   |
| <b><i>r</i></b>                 | <b>14</b>   |
| <b><i>s<sub>on</sub></i></b>    | <b>0.8</b>  |
| <b><i>s<sub>off</sub></i></b>   | <b>12.5</b> |
| <b><i>r<sub>on</sub></i></b>    | <b>8.75</b> |
| <b><i>r<sub>off</sub></i></b>   | <b>1.6</b>  |
| <b><i>s<sub>d,on</sub></i></b>  | <b>5.6</b>  |
| <b><i>s<sub>d,off</sub></i></b> | <b>1.8</b>  |
| <b><i>r<sub>d,on</sub></i></b>  | <b>8.75</b> |
| <b><i>r<sub>d,off</sub></i></b> | <b>0.9</b>  |
